# Supplementary material
Source: PubMed Central journal article supplement (PMC6431273)

Supplemental Figure 2. Mean Predicted Activation by Care Role and Perceived Usefulness

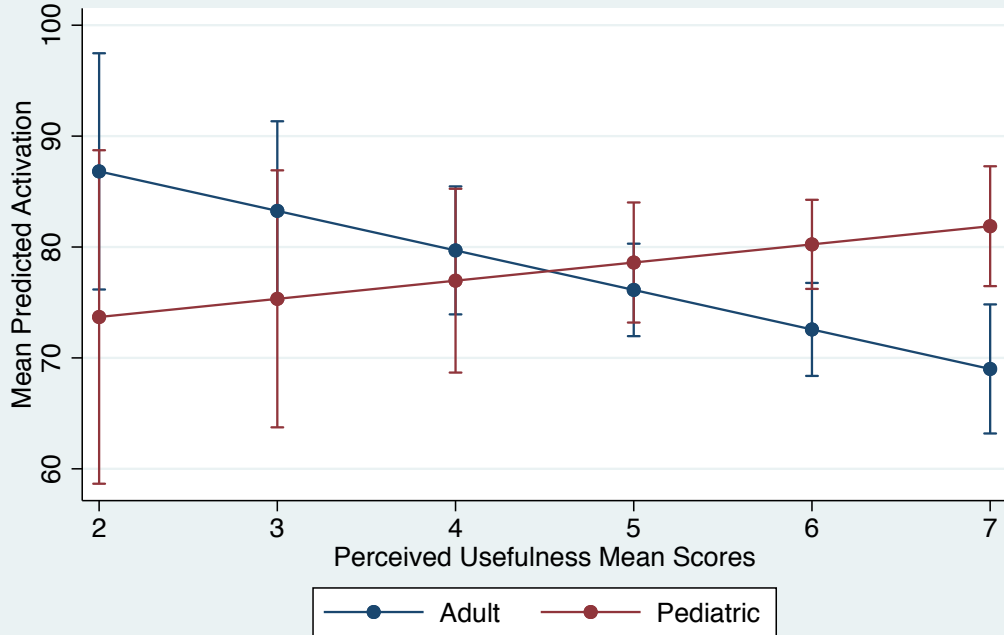

Supplement: NIHMS1507610-supplement-Suppl3.pdf [file NIHMS1507610-supplement-Suppl3.pdf]
